# Supplementary material for: A Heat-Killed Probiotic Mixture Regulates Immune T Cells Balance and IgE Production in House Dust Mite Extraction-Induced Atopic Dermatitis Mice
Source: MDPI journal article supplement (doi:10.3390/microorganisms10101881), 2022-09-21
Supplement: s1 [file s1]

# **A Heat-killed Probiotic Mixture Regulates Immune T cells Balance and IgE Production in House Dust Mite Extraction-induced Atopic Dermatitis Mice**

Hsin-Yu Chen<sup>1#</sup>, Yung-Tsung Chen<sup>2#</sup>, Kuan-Yi Li<sup>1</sup>, Hsiao-Wen Huang<sup>1</sup>, Yu-Chun Lin<sup>3</sup>,  
Ming-Ju Chen<sup>1\*</sup>

<sup>1</sup>Department of Animal Science and Technology, National Taiwan University, Taipei City, Taiwan

<sup>2</sup>Department of Food Science, National Taiwan Ocean University, Keelung City, Taiwan

<sup>3</sup>Livestock Research Institute, Council of Agriculture, Executive Yuan, Tainan, Taiwan

#Hsin-Yun Chen and Yung-Tsung Chen contributed equally to this work.

## **\*Corresponding author:**

Ming-Ju Chen

Department of Animal Science and Technology

National Taiwan University, Taipei City, Taiwan

No. 50, Ln. 155, Sec. 3, Keelung Rd., Da'an Dist., Taipei City 106032, Taiwan

email: cmj@ntu.edu.tw

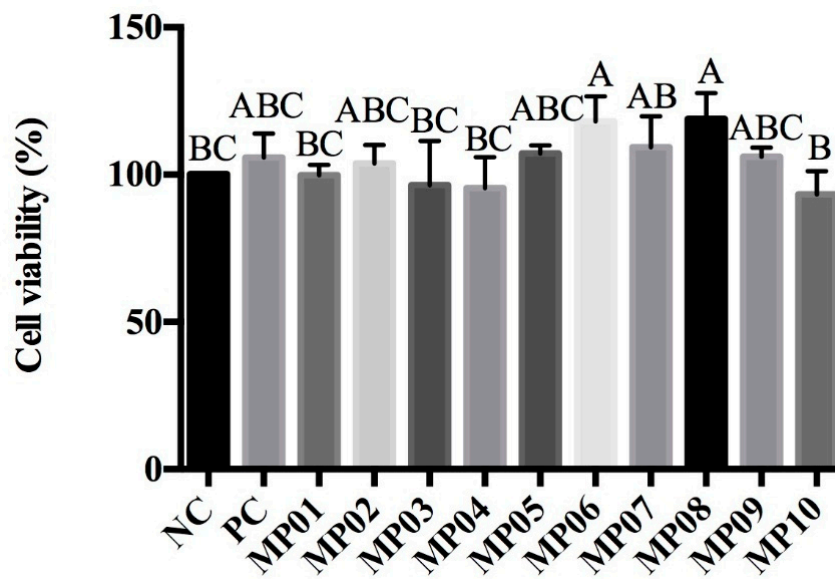

**Supplementary Figure S1.** Effects of the different LAB strains on the cell viability analyzed by MTT assay after 24-hour co-culturing with RAW 264.7. NC: Negative control; PC: Positive control (50 ng/mL LPS). Value represents means  $\pm$  SD. (n=3). Data were analyzed by ANOVA with Duncan's multiple comparison tests. Means for each group without a common letter are significantly different ( $P < 0.05$ ).

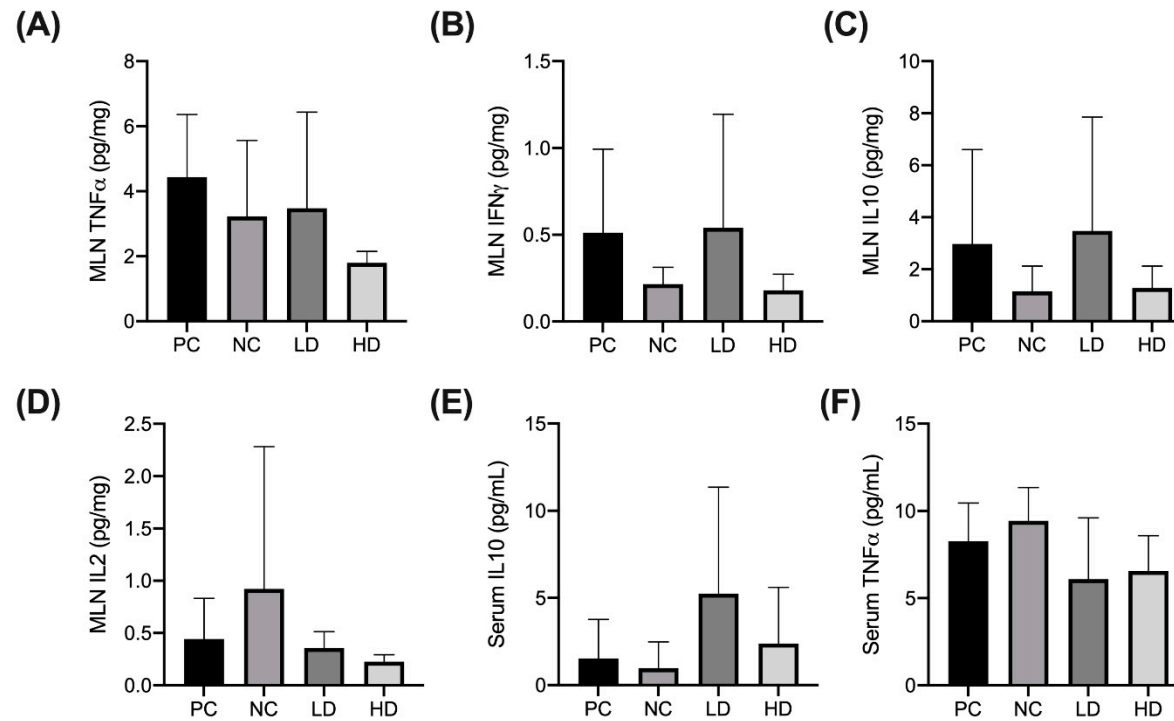

**Supplementary Figure S2.** Effects of a combination of heat-killed MP01 and MP02 strains on cytokines production in mesenteric lymph nodes (MLN) and serum of HDM-extraction induced AD mice. (A)TNF- $\alpha$ , (B)IFN- $\gamma$ , (C)IL-10 and (D)IL-2 in mesenteric lymph nodes and (E)IL-10 and (F)TNF- $\alpha$  cytokines in serum of HDM-extraction induced AD mice after treatment. Data were analyzed by one-way ANOVA with Tukey's multiple comparison test. Bars indicate means  $\pm$  SD.

**Supplementary Table S1.** 16S rRNA gene of potential strains analyzed by BLAST from NCBI database

| Potential strains | Species                        | Identity | Species                        | Identity | Species                   | Identity |
|-------------------|--------------------------------|----------|--------------------------------|----------|---------------------------|----------|
| MP01              | <i>Lactococcus lactis</i>      | 100%     | <i>Lactococcus lactis</i>      | 100%     | <i>Lactococcus lactis</i> | 99.87%   |
| MP02              | <i>Lactobacillus paracasei</i> | 99%      | <i>Lactobacillus paracasei</i> | 99%      | <i>Lactobacillus zeae</i> | 99%      |
